# Supplementary material for: Differential color development and response to light deprivation of fig (Ficus carica L.) syconia peel and female flower tissues: transcriptome elucidation
Source: PubMed Central journal article supplement (PMC6533723; doi:10.1186/s12870-019-1816-9), 2019-05-23

**Differential color development and response to light deprivation of  
fig (*Ficus carica* L.) syconia peel and female flower tissues:  
transcriptome elucidation**

Ziran Wang<sup>1</sup>, Miaoyu Song<sup>1</sup>, Yunze Li<sup>1</sup>, Shangwu Chen<sup>2</sup>, Huiqin Ma<sup>1\*</sup>

<sup>1</sup>College of Horticulture, China Agricultural University, Beijing, P.R. China

<sup>2</sup>College of Food Science and Nutritional Engineering, China Agricultural University,  
Beijing, P.R. China

Ziran Wang: [wangziran@cau.edu.cn](mailto:wangziran@cau.edu.cn)

Miaoyu Song: [songmiaoyu@cau.edu.cn](mailto:songmiaoyu@cau.edu.cn)

Yunze Li: [liyunze@cau.edu.cn](mailto:liyunze@cau.edu.cn)

Shangwu Chen: [swchen@cau.edu.cn](mailto:swchen@cau.edu.cn)

Huiqin Ma: [hqma@cau.edu.cn](mailto:hqma@cau.edu.cn)

\*Correspondence: Huiqin Ma, [hqma@cau.edu.cn](mailto:hqma@cau.edu.cn)

**Table S1** Primer sequences of structural genes in the flavonoid-biosynthesis pathway used for cDNA cloning

| Gene name     | Seq ID    | Primer sequence (5'→3')                                                       | Length (bp) | Annealing temperature (°C) |                                                                                       |
|---------------|-----------|-------------------------------------------------------------------------------|-------------|----------------------------|---------------------------------------------------------------------------------------|
| <i>FcCHS1</i> | c33458_g1 | Forward: ATGGCCTCTGTATACGAAATCCG<br>Reverse: TTAATTAAGGGCAAGACTGCGG           | 1173        | 56                         | 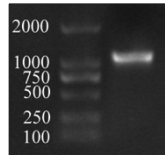   |
| <i>FcCHI1</i> | c658_g1   | Forward: ATGCCTCCGATGACTTAC<br>Reverse: TCAAAGTCCAACAGTTTCT                   | 702         | 58                         |    |
| <i>FcF3H1</i> | c43823_g1 | Forward: ATGGAGGTAGAGAGGGTCC<br>Reverse: TTATTGGGGAAGCTTGTTGAGC               | 1008        | 56                         |    |
| <i>FcF3H1</i> | c32643_g3 | Forward: ATGCCTTCTGTCTCTATCATCCT<br>Reverse: TTATGCTTGATATAAGTGTGGGCC         | 1530        | 56                         |  |
| <i>FcDFR1</i> | c46884_g6 | Forward: ATGGCAAATGCAAACAAATAAATTTTCG<br>Reverse: TTAATAAGATCACCAAATTTCCCTCGC | 1056        | 57                         |  |

---

*FcUFGT1*      c45009\_g5      Forward: ATGGCATCACCACCACCA  
Reverse: TCACTCTTGAACTCCTCCGG

---

1374

58

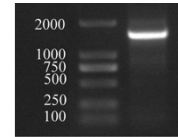

**Table S2** Primer sequences of genes used for verification of digital gene-expression results by RT-qPCR

| <b>Gene name</b> | <b>Seq ID</b>  | <b>Forward primer (5'→3')</b> | <b>Reverse primer (5'→3')</b> |
|------------------|----------------|-------------------------------|-------------------------------|
| <i>Actin</i>     | Reference gene | GCCATTCAAGCCGTGCTTT           | TGGGAACAGTGTGGCTGACA          |
| <i>FcCHS1</i>    | c33458_g1      | ACCAATCCATCTGAGGCACA          | GATAATCAGCCTGCGAGACG          |
| <i>FcCHS2</i>    | c46769_g2      | CCGTGAAGTTGGGCTTACAT          | AAACCACACTTGGCTTCCAC          |
| <i>FcCH34</i>    | c46769_g3      | CAAAGCACGTGACTCCCATC          | ATTCCTCGACGGTCACCAT           |
| <i>FcCHI1</i>    | c658_g1        | GTAACGGGTCCGTTTGAGAA          | GTAAAGAACCGGACGGTGA           |
| <i>FcCHI2</i>    | c47235_g1      | CACTTCCCTTCTTCCCCTTC          | TGGTTGATGAAATCCCCTTC          |
| <i>FcF3H1</i>    | c43823_g1      | GTCGGTCGGGTATTCTTTGA          | TAGATGGAGGAGCCATGAGG          |
| <i>FcF3H2</i>    | c73203_g1      | GAGGTAGAGAGGGTCCAAGC          | GAAACCCACTCTTTGCTCG           |
| <i>FcF3H3</i>    | c29451_g2      | TGCGGGCATGGAGGATATAG          | CACTTCCCCAAAAGGCCATC          |
| <i>FcF3H1</i>    | c32643_g1      | GTGGCGGAGCAGTTCCTTA           | GAGGTGAACGGTGGTGATCT          |
| <i>FcF3H2</i>    | c42263_g3      | GATCCGCCACCCTAAAATCT          | GGATGTGGTAGCCGTTGACT          |
| <i>FcDFR1</i>    | c46884_g6      | CTCCTCCTCCGAATTAGCGT          | CGCCTGATTCTGTTTCCTCG          |
| <i>FcDFR2</i>    | c18574_g2      | AGGTGGAGGTAAGAGCAGCA          | GATAGCCCATGCCACA ACTT         |
| <i>FcDFR3</i>    | c43356_g1      | TGTGGAGGGAAGCTTTAGTGA         | GCTGCTCGCCAATAACAGTT          |
| <i>FcANS1</i>    | c59676_g1      | CATCATGCACATTGGTGACA          | GTGCTGGATATGCTGCTGAA          |
| <i>FcANS2</i>    | c42804_g1      | GGCAGTCGTTGAAGAAGGTG          | TCCAACCGTCGACTTATCC           |

---

|                 |           |                      |                      |
|-----------------|-----------|----------------------|----------------------|
| <i>FcUFGT1</i>  | C45009_g5 | GAGTTGATGGTGGGGCTTTC | TCACTCTTGAACTCCTCCGG |
| <i>FcUFGT2</i>  | c78174_g2 | CGGAGAACACGGAGAAGAAG | ATTCCCCTCCAAATTCCAAC |
| <i>FcMYB114</i> | c42269_g1 | TGAGCGGGAGGAGATTGATC | GCAAACCAACAGACCCACAT |
| <i>FcHY5</i>    | c37077_g1 | CACTCACAAACCATCGGCAT | GCAAGGAAAGGAAGAAGGC  |

---

**Table S3** Summary of the sequencing assembly

| <b>Sequences</b>                       | <b>T4-P</b>   | <b>T4-F</b>   | <b>LD-P</b>   | <b>LD-F</b>   |
|----------------------------------------|---------------|---------------|---------------|---------------|
| <b>Before trimming</b>                 |               |               |               |               |
| Total nucleotides (bp)                 | 8,406,965,982 | 7,394,743,914 | 9,575,327,666 | 9,582,970,682 |
| Number of raw reads                    | 55,870,328    | 48,971,814    | 63,412,766    | 63,463,382    |
| Q20 percentage (%)                     | 96.45         | 95.91         | 97.01         | 97.05         |
| <b>After trimming</b>                  |               |               |               |               |
| Total nucleotides (bp)                 | 7,880,080,702 | 6,747,389,564 | 9,124,422,432 | 9,137,841,606 |
| Number of raw reads                    | 54,294,240    | 47,519,894    | 61,400,466    | 61,519,498    |
| Q20 percentage (%)                     | 98.20         | 98.02         | 98.42         | 98.43         |
| <b>Mapping ratio</b>                   |               |               |               |               |
| Total nucleotides of transcripts (bp)  | 54,294,240    | 47,519,894    | 61,400,466    | 61,519,498    |
| Mapped nucleotides of transcripts (bp) | 49,665,838    | 43,589,627    | 55,167,988    | 56,178,166    |
| Mapped rate (%)                        | 91.48         | 91.37         | 89.85         | 91.32         |

T4-P, peel at stage T4; T4-F, female flower tissue at stage T4; LD-P, stage 4 peel following light-deprivation treatment; LD-F, stage 4 female flower tissue following light-deprivation treatment.

**Table S4** Shared differentially expressed genes in ‘Zibao’ peel and female flower tissue following light deprivation

| <b>Seq_id</b>               | <b>Regulated</b> | <b>Annotation</b>                            |
|-----------------------------|------------------|----------------------------------------------|
| <b>Transcription factor</b> |                  |                                              |
| c39854_g1                   | up               | Basic helix-loop-helix protein 50            |
| c43008_g2                   | up               | Basic helix-loop-helix protein 75            |
| c43099_g1                   | up               | Basic helix-loop-helix protein 112           |
| c66694_g1                   | up               | Basic helix-loop-helix protein 78            |
| c72970_g1                   | up               | Basic helix-loop-helix protein 62            |
| c81283_g1                   | up               | Basic helix-loop-helix protein 62            |
| c38338_g1                   | up               | bZIP transcription factor 57                 |
| c41486_g1                   | up               | Ethylene-responsive transcription factor 061 |
| c39346_g3                   | up               | HD-ZIP protein ATHB-15                       |
| c45256_g3                   | up               | Heat shock factor protein HSF24              |
| c12586_g1                   | up               | MYB family transcription factor              |
| c36728_g1                   | up               | Transcription factor MYB1R1                  |
| c40543_g2                   | up               | MYB-related protein 3R-1                     |
| c40750_g1                   | up               | Transcription repressor MYB5                 |
| c44925_g1                   | up               | Transcription factor MYB86                   |
| c81761_g1                   | up               | NAC domain-containing protein 89             |
| c23885_g1                   | up               | WRKY transcription factor 9                  |
| c23885_g2                   | up               | WRKY transcription factor 9                  |
| c40908_g1                   | up               | WRKY transcription factor 72                 |
| c40266_g1                   | down             | Basic helix-loop-helix protein 110           |
| c29668_g2                   | down             | Ethylene-responsive transcription factor 1   |
| c41517_g1                   | down             | Floral homeotic protein APETALA 2            |
| c9228_g1                    | down             | GATA transcription factor 2                  |
| c26517_g2                   | down             | Heat stress transcription factor 25          |
| c43194_g3                   | down             | Heat stress transcription factor A-2         |
| c37077_g1                   | down             | Transcription factor HY5                     |

|           |      |                                 |
|-----------|------|---------------------------------|
| c72503_g1 | down | Transcription factor DIVARICATA |
| c27914_g3 | down | Transcription factor DIVARICATA |
| c44885_g4 | down | Transcription factor DIVARICATA |
| c41017_g1 | down | Transcription factor DIVARICATA |
| c45044_g1 | down | Transcription factor DIVARICATA |
| c32875_g1 | down | Transcription factor NAC        |
| c33198_g2 | down | Transcription factor TCP22      |
| c38915_g2 | down | Transcription factor TCP19      |

#### **Anthocyanin-biosynthesis pathway**

|           |      |                                                         |
|-----------|------|---------------------------------------------------------|
| c46816_g1 | up   | LRR receptor-like serine/threonine-protein kinase FLS2: |
| c388_g2   | up   | Phenylalanine ammonia-lyase 1                           |
| c25197_g1 | up   | Anthocyanidin synthase                                  |
| c46769_g3 | up   | Chalcone synthase 3                                     |
| c42667_g2 | up   | UDP-glucose flavonoid 3-O-glucosyltransferase 6         |
| c23651_g1 | up   | Anthocyanidin synthase                                  |
| c32643_g1 | up   | Flavonoid 3'-monooxygenase                              |
| c42263_g2 | up   | Flavonoid 3'-monooxygenase                              |
| c59670_g1 | up   | UDP-glucose flavonoid 3-O-glucosyltransferase 7         |
| c48323_g1 | down | UDP-glycosyltransferase 86A1                            |
| c41071_g2 | down | UDP-glucose flavonoid 3-O-glucosyltransferase 6         |

#### **Chlorophyll a-b binding protein**

|           |      |                                               |
|-----------|------|-----------------------------------------------|
| c25429_g1 | up   | Sigma factor binding protein 1, chloroplastic |
| c83332_g1 | down | Polygalacturonase                             |
| c78439_g1 | down | LHCI type II CAB                              |
| c47616_g1 | down | CAB-10A                                       |
| c53957_g1 | down | LHCI type III CAB-P4                          |
| c59646_g1 | down | LHCII protein 4.2                             |

#### **Sugar accumulation**

|           |    |                                        |
|-----------|----|----------------------------------------|
| c46424_g1 | up | Beta-glucosidase 12                    |
| c26539_g1 | up | Putative alpha-L-fucosidase 1          |
| c23588_g1 | up | Bidirectional sugar transporter N3     |
| c22022_g1 | up | Lysine-rich arabinogalactan protein 18 |
| c31609_g1 | up | Sucrose synthase 6                     |



|           |      |                                                     |
|-----------|------|-----------------------------------------------------|
| c59597_g1 | up   | Bidirectional sugar transporter SWEET12             |
| c43584_g1 | up   | Fasciclin-like arabinogalactan protein 1            |
| c38453_g1 | up   | ABC transporter C family member 5                   |
| c11665_g1 | up   | MGDG synthase type A                                |
| c37376_g1 | up   | Glycogenin-like protein 7                           |
| c28785_g1 | up   | Classical arabinogalactan protein 9                 |
| c31609_g2 | up   | Sucrose synthase 6                                  |
| c16805_g1 | up   | Classical arabinogalactan protein 9                 |
| c43519_g2 | up   | Beta-fructofuranosidase, insoluble isoenzyme CWINV1 |
| c35815_g2 | up   | Putative glycosyltransferase 5                      |
| c39310_g2 | up   | Acetyl-CoA acetyltransferase, cytosolic 1           |
| c46841_g1 | up   | Lysine histidine transporter 1                      |
| c42221_g1 | down | Leucine-rich repeat extensin-like protein 3         |
| c31627_g1 | down | Galactinol synthase 1                               |
| c75967_g1 | down | Organic cation/carnitine transporter 3              |
| c39262_g3 | down | Sulfated surface glycoprotein 185                   |
| c32237_g1 | down | Hydroquinone glucosyltransferase                    |
| c44351_g1 | down | Zeatin O-xylosyltransferase                         |
| c45793_g1 | down | Lysine-specific demethylase 3B                      |
| c37451_g1 | down | ABC transporter G family member 12                  |
| c59640_g1 | down | ATP-dependent 6-phosphofructokinase 7;              |
| c45588_g2 | down | Probable glycosyltransferase At5g03795              |
| c15951_g1 | down | Lysine-specific demethylase 3B                      |
| c45290_g1 | down | Epidermis-specific secreted glycoprotein EP1        |
| c73045_g1 | down | Hydroxyproline-rich glycoprotein 1                  |
| c60053_g1 | down | Fructose-bisphosphate aldolase                      |
| c24172_g1 | down | Fructose-bisphosphate aldolase cytoplasmic isozyme  |

**Cytochrome-related protein**

|           |    |                           |
|-----------|----|---------------------------|
| c33311_g1 | up | Cytochrome P450 CP1       |
| c43074_g1 | up | Cytochrome P450 81D11     |
| c18476_g1 | up | Cytochrome P450 CYP736A12 |
| c66778_g1 | up | Cytochrome P450 93A1      |
| c46699_g1 | up | Cytochrome P450 71D11     |

|           |      |                                     |
|-----------|------|-------------------------------------|
| c40433_g1 | up   | Cytochrome P450 82C4                |
| c34981_g1 | up   | Cytochrome P450 734A1               |
| c78221_g1 | down | Cytochrome b5 isoform B             |
| c46125_g2 | down | Full=Cytochrome c oxidase subunit 1 |
| c53653_g1 | down | Cytochrome P450 71B34               |

#### **Trace element-related protein**

|           |      |                                                  |
|-----------|------|--------------------------------------------------|
| c35690_g1 | up   | Calmodulin-like protein 11                       |
| c37914_g1 | up   | Boron transporter 1                              |
| c37914_g2 | up   | Boron transporter 1                              |
| c30906_g1 | up   | Ca (2 <sup>+</sup> )-ATPase isoform 2            |
| c6794_g1  | up   | Zinc finger protein STOP1 homolog                |
| c44870_g1 | up   | Potassium channel AKT1                           |
| c46335_g3 | up   | Homogentisate phytyltransferase 2, chloroplastic |
| c29896_g2 | up   | Calmodulin-like protein 5                        |
| c60369_g1 | down | COBW domain-containing protein 1                 |
| c32683_g1 | down | Zinc finger protein CONSTANS-LIKE 7              |
| c45619_g1 | down | Zinc finger protein MAGPIE                       |
| c60176_g1 | down | Calcium-binding protein CML38                    |

#### **Stress response**

|           |      |                                          |
|-----------|------|------------------------------------------|
| c59619_g1 | down | Heat shock protein                       |
| c25561_g1 | down | 15.7 kDa Heat shock protein, peroxisomal |
| c46871_g2 | down | Heat shock cognate 70 kDa protein        |
| c46871_g5 | down | Heat shock 70 kDa protein                |
| c46871_g1 | down | Heat shock cognate 70 kDa protein 2      |
| c45569_g1 | down | Heat shock 70 kDa protein 8              |
| c46276_g1 | down | 17.3 kDa Class I heat shock protein      |
| c46871_g3 | down | Heat shock 70 kDa protein                |
| c60423_g1 | down | 18.2 kDa Class I heat shock protein      |
| c38276_g4 | down | Heat shock 70 kDa protein                |
| c41926_g1 | down | Small heat shock protein, chloroplastic  |
| c46998_g1 | down | 17.4 kDa Class III heat shock protein    |
| c28107_g4 | down | Heat shock cognate 70 kDa protein        |
| c29501_g1 | down | Heat shock cognate 70 kDa protein        |

|           |      |                                          |
|-----------|------|------------------------------------------|
| c46276_g3 | down | 17.3 kDa Class I heat shock protein      |
| c46276_g2 | down | 17.3 kDa Class I heat shock protein      |
| c46567_g1 | down | Heat shock protein 83                    |
| c39984_g1 | down | Heat shock 40 kDa protein 1 protein 40   |
| c32064_g1 | down | 23.6 kDa Heat shock protein              |
| c36874_g1 | down | Heat shock protein 82                    |
| c38276_g2 | down | Heat shock 70 kDa protein 1              |
| c31839_g1 | down | Heat shock protein 90-1; Short=AtHSP90.1 |
| c15645_g1 | down | Small heat shock protein                 |

**Dirigent protein**

|           |    |                                                             |
|-----------|----|-------------------------------------------------------------|
| c41473_g1 | up | Metalloendoproteinase 1                                     |
| c40471_g1 | up | Inhibitor of trypsin and Hageman factor                     |
| c25369_g1 | up | Thaumatococcus-like protein 1                               |
| c43066_g1 | up | Serine protease inhibitor 2                                 |
| c35833_g2 | up | Allene oxide synthase, chloroplastic                        |
| c39260_g2 | up | Pathogenesis-related protein 1                              |
| c78371_g1 | up | Arginine decarboxylase                                      |
| c35833_g1 | up | Allene oxide synthase                                       |
| c36160_g1 | up | Alpha-amylase/subtilisin inhibitor                          |
| c47307_g1 | up | Major latex allergen Hev b 5                                |
| c35833_g3 | up | Allene oxide synthase, chloroplastic                        |
| c22164_g1 | up | Pathogenesis-related protein STH-2                          |
| c35850_g2 | up | Subtilisin-like protease                                    |
| c22521_g1 | up | Pathogen-related protein                                    |
| c29750_g1 | up | BTB/POZ domain-containing protein At5g48130                 |
| c29646_g1 | up | Dirigent protein 19                                         |
| c31413_g1 | up | MLO-like protein 11                                         |
| c37666_g2 | up | Putative disease resistance protein RGA1                    |
| c45494_g1 | up | Retrovirus-related Pol polyprotein from transposon TNT 1-94 |
| c47181_g1 | up | Putative disease resistance RPP13-like protein 1            |
| c39793_g2 | up | MLO-like protein 6                                          |
| c40997_g2 | up | Disease resistance protein RPP13                            |
| c46256_g1 | up | Isoflavone reductase-like protein                           |

|                       |      |                                                                  |
|-----------------------|------|------------------------------------------------------------------|
| c36373_g1             | up   | Allene oxide synthase, chloroplastic                             |
| c17039_g1             | up   | Thaumatococcus-like protein                                      |
| c47022_g4             | up   | Endochitinase                                                    |
| c73214_g1             | up   | Alkaline elastase YaB                                            |
| c41026_g2             | up   | Major allergen Pru ar 1                                          |
| c45198_g2             | up   | Endochitinase PR4                                                |
| c39260_g1             | up   | Pathogenesis-related protein 1                                   |
| c47290_g3             | up   | Putative disease resistance RPP13-like protein 3                 |
| c44303_g3             | up   | Pirin-like protein                                               |
| c43392_g1             | up   | Inactive TPR repeat-containing thioredoxin TTL3                  |
| c8892_g1              | down | Cysteine proteinase COT44                                        |
| c40563_g1             | down | DAG protein, chloroplastic                                       |
| c28279_g1             | down | Protein ASPARTIC PROTEASE IN GUARD CELL 1                        |
| c37829_g1             | down | Protein EARLY RESPONSIVE TO DEHYDRATION 15                       |
| c42670_g1             | down | BTB/POZ and MATH domain-containing protein 3                     |
| c47387_g1             | down | Outer envelope protein 80, chloroplastic                         |
| c25738_g1             | down | BTB/POZ domain-containing protein At2g30600                      |
| c42218_g1             | down | Thioredoxin-like 1-1, chloroplastic                              |
| c25777_g1             | down | Cysteine proteinase inhibitor 1                                  |
| <b>Plant hormones</b> |      |                                                                  |
| c38441_g3             | up   | Brassinosteroid-regulated protein BRU1                           |
| c38441_g1             | up   | Brassinosteroid-regulated protein BRU1                           |
| c26485_g1             | up   | Cytokinin dehydrogenase 3                                        |
| c43993_g1             | up   | Cytokinin dehydrogenase 4                                        |
| c24588_g1             | up   | Auxin transport protein BIG                                      |
| c34871_g1             | up   | Cytokinin riboside 5'-monophosphate phosphoribohydrolase<br>LOG7 |
| c25300_g2             | up   | Auxin efflux carrier component 3                                 |
| c40067_g1             | up   | Auxin-binding protein ABP19a                                     |
| c48357_g1             | up   | SAUR family protein                                              |
| c66500_g2             | up   | Auxin transporter-like protein 2                                 |
| c32874_g1             | up   | Cytokinin riboside 5'-monophosphate phosphoribohydrolase<br>LOG8 |

|                                   |      |                                                                |
|-----------------------------------|------|----------------------------------------------------------------|
| c36086_g2                         | up   | 9-cis-epoxycarotenoid dioxygenase NCED6, chloroplastic         |
| c20025_g1                         | up   | Auxin response factor 16                                       |
| c2285_g1                          | up   | Serine/threonine-protein kinase SAPK2                          |
| c1655_g1                          | down | Auxin-induced protein X10A                                     |
| c54431_g1                         | down | Protein ABSCISIC ACID-INSENSITIVE 5                            |
| c45831_g4                         | down | Indole-3-acetic acid-induced protein ARG7                      |
| <b>Ethylene-synthesis pathway</b> |      |                                                                |
| c780_g1                           | up   | S-adenosylmethionine synthase 1                                |
| c2984_g1                          | up   | S-adenosylmethionine synthase 1                                |
| c33708_g1                         | up   | S-adenosylmethionine synthase 1                                |
| c39734_g3                         | up   | S-adenosylmethionine synthase 2                                |
| <b>Oxidoreductase</b>             |      |                                                                |
| c48232_g1                         | up   | Peroxidase 4                                                   |
| c17284_g1                         | up   | Peroxidase 51                                                  |
| c32133_g1                         | up   | Benzenediol:oxygen oxidoreductase 15                           |
| c1295_g1                          | up   | Putative laccase-9c                                            |
| c37320_g1                         | up   | Benzenediol:oxygen oxidoreductase 7                            |
| c46561_g1                         | up   | Polyphenol oxidase, chloroplastic                              |
| c40790_g1                         | up   | Cationic peroxidase 1                                          |
| c38513_g1                         | up   | Peroxidase 15                                                  |
| c53614_g1                         | up   | L-ascorbate oxidase homolog                                    |
| c47328_g1                         | up   | Tropinone reductase-like 2                                     |
| c22895_g2                         | up   | Polyphenol oxidase, chloroplastic                              |
| c45688_g4                         | down | Oxygen-dependent coproporphyrinogen-III oxidase, chloroplastic |
| c47133_g3                         | down | NADH-ubiquinone oxidoreductase chain 2                         |
| c45361_g3                         | down | Cinnamoyl-CoA reductase 1                                      |
| c40391_g1                         | down | NuA4 complex subunit EAF3 homolog                              |
| c70747_g1                         | down | 12-Oxophytodienoate reductase 1                                |
| c45955_g2                         | down | NADH-ubiquinone oxidoreductase chain 2                         |
| c78250_g1                         | down | 1-Aminocyclopropane-1-carboxylate oxidase 1                    |
| c45694_g6                         | down | Putative L-ascorbate peroxidase 6                              |
| c59623_g1                         | down | Ribonucleoside-diphosphate reductase small chain               |

|                       |      |                                                                            |
|-----------------------|------|----------------------------------------------------------------------------|
| c32402_g2             | down | Cinnamoyl-CoA reductase 1                                                  |
| c15969_g1             | down | Glutamine synthetase nodule isozyme                                        |
| <b>Protein kinase</b> |      |                                                                            |
| c39208_g1             | up   | LRR receptor-like serine/threonine-protein kinase At1g53430                |
| c31899_g1             | up   | Acyl-CoA--sterol O-acyltransferase 1                                       |
| c40495_g1             | up   | Receptor-like protein kinase BRI1-like 3                                   |
| c37679_g1             | up   | G-type lectin S-receptor-like serine/threonine-protein kinase<br>RLK1      |
| c37519_g1             | up   | Serine acetyltransferase 3, mitochondrial                                  |
| c35789_g1             | up   | Polyamine transporter At3g13620                                            |
| c43113_g1             | up   | LRR receptor-like serine/threonine-protein kinase At1g06840                |
| c43038_g1             | up   | Serine/threonine-protein kinase At5g01020                                  |
| c43674_g3             | up   | G-type lectin S-receptor-like serine/threonine-protein kinase<br>At2g19130 |
| c45077_g2             | up   | LRR receptor-like serine/threonine-protein kinase At4g36180                |
| c2285_g1              | up   | Serine/threonine-protein kinase SAPK2                                      |
| c40326_g1             | up   | Leucine-rich repeat receptor-like serine/threonine-protein<br>kinase BAM1  |
| c44456_g1             | up   | Kinesin-like protein D                                                     |
| c9350_g1              | up   | LRR receptor-like serine/threonine-protein kinase At1g56140                |
| c20890_g1             | down | Serine carboxypeptidase-like 19                                            |
| c37845_g1             | down | Serine/arginine-rich splicing factor SR45a                                 |
| c44051_g2             | down | Serine/threonine-protein kinase At1g01540                                  |
| c42099_g1             | down | CBL-interacting protein kinase 16                                          |
| c47097_g1             | down | G-type lectin S-receptor-like serine/threonine-protein kinase<br>SD1-1     |
| c45872_g1             | down | Serine/threonine-protein kinase STN8, chloroplastic                        |
| c51272_g1             | down | CBL-interacting serine/threonine-protein kinase 25                         |
| c72059_g1             | down | Acyl-[acyl-carrier-protein]                                                |
| c33825_g1             | down | Phosphoserine aminotransferase, chloroplastic                              |
| c51376_g1             | down | LRR receptor-like serine/threonine-protein kinase At4g36180                |
| <b>Others</b>         |      |                                                                            |
| c41196_g1             | up   | (-)-Germacrene D synthase                                                  |

|           |    |                                                |
|-----------|----|------------------------------------------------|
| c40756_g1 | up | Prostaglandin G/H synthase 1                   |
| c23523_g1 | up | MpBBI, partial                                 |
| c73067_g1 | up | Hypothetical protein L484_005338               |
| c62863_g1 | up | –                                              |
| c47082_g1 | up | FAD-binding domain-containing family protein   |
| c41801_g1 | up | –                                              |
| c37714_g1 | up | Carbonic anhydrase 2                           |
| c15770_g1 | up | Tryptophan synthase beta chain 2               |
| c36743_g1 | up | myosin-Vb-like                                 |
| c45415_g2 | up | Putative mitochondrial chaperone BCS1-B        |
| c39358_g1 | up | Putative sulfate transporter 3.5               |
| c62561_g1 | up | Hypothetical protein L484_014351               |
| c45133_g1 | up | –                                              |
| c27960_g1 | up | Sulfate transporter 3.1                        |
| c79258_g1 | up | Myosin-12                                      |
| c16014_g1 | up | Fatty acid desaturase 3                        |
| c17733_g1 | up | Myosin-12                                      |
| c45888_g1 | up | Polyneuridine-aldehyde esterase-like isoform 1 |
| c63303_g1 | up | –                                              |
| c22828_g1 | up | BAG family molecular chaperone regulator 3     |
| c40019_g2 | up | –                                              |
| c47959_g1 | up | Hypothetical protein L484_022573               |
| c22655_g1 | up | Hypothetical protein L484_013383               |
| c60796_g1 | up | Unnamed protein product                        |
| c59907_g1 | up | Wound-induced protein WIN2                     |
| c28345_g1 | up | Hypothetical protein L484_005918               |
| c34701_g1 | up | Aquaporin TIP4-1                               |
| c44811_g1 | up | LL-diaminopimelate aminotransferase            |
| c78697_g1 | up | Uncharacterized protein LOC103332309           |
| c78290_g1 | up | Auxin-induced protein 5NG4                     |
| c34941_g1 | up | Hypothetical protein PRUPE_ppa015386mg         |
| c25829_g1 | up | Hypothetical protein L484_026099               |
| c33700_g1 | up | –                                              |

|           |    |                                                              |
|-----------|----|--------------------------------------------------------------|
| c41398_g2 | up | Hypothetical protein L484_018234                             |
| c4888_g1  | up | Hypothetical protein L484_025881                             |
| c1530_g1  | up | Hypothetical protein POPTR_0001s23960g                       |
| c41682_g1 | up | –                                                            |
| c11171_g1 | up | Hypothetical protein L484_027406                             |
| c34564_g1 | up | –                                                            |
| c33608_g1 | up | Amino acid binding protein, putative                         |
| c30088_g1 | up | –                                                            |
| c42780_g1 | up | Protein spinster                                             |
| c1860_g2  | up | Receptor-like protein 12                                     |
| c56047_g1 | up | Hypothetical protein L484_020796                             |
| c66337_g1 | up | –                                                            |
| c24015_g1 | up | Hypothetical protein L484_007659                             |
| c25103_g1 | up | Tryptophan aminotransferase-related protein 2                |
| c74812_g1 | up | Hypothetical protein L484_009723                             |
| c35527_g1 | up | Patatin group A-3                                            |
| c27620_g1 | up | Polygalacturonase                                            |
| c34824_g1 | up | –                                                            |
| c79216_g1 | up | Putative nitrite transporter                                 |
| c27259_g1 | up | Cation/H(+) antiporter 20                                    |
| c68709_g1 | up | Hypothetical protein L484_013008                             |
| c38792_g1 | up | Cellulose synthase-like protein E1                           |
| c37873_g2 | up | Uncharacterized protein LOC103332843                         |
| c45446_g2 | up | Salicylate O-methyltransferase                               |
| c42600_g1 | up | NAC domain-containing protein 74                             |
| c47370_g1 | up | –                                                            |
| c67272_g1 | up | –                                                            |
| c39584_g2 | up | –                                                            |
| c30373_g1 | up | BAG family molecular chaperone regulator 1                   |
| c15713_g1 | up | Putative L-type lectin-domain containing receptor kinase S.5 |
| c37155_g1 | up | Putative protein phosphatase 2C 65                           |
| c46513_g4 | up | E3 ubiquitin-protein ligase UPL1                             |
| c44135_g1 | up | Hypothetical protein L484_021343                             |



|           |    |                                                          |
|-----------|----|----------------------------------------------------------|
| c44782_g3 | up | –                                                        |
| c45663_g1 | up | E3 ubiquitin-protein ligase ATL42                        |
| c24193_g1 | up | Hypothetical protein PRUPE_ppa022164mg                   |
| c46037_g1 | up | Hypothetical protein POPTR_0016s02500g                   |
| c45620_g1 | up | Nucleobase-ascorbate transporter 2                       |
| c42270_g1 | up | Hypothetical protein L484_012754                         |
| c58399_g1 | up | –                                                        |
| c35483_g1 | up | Hypothetical protein POPTR_0004s23990g                   |
| c78947_g1 | up | Hypothetical protein L484_021563                         |
| c62717_g1 | up | –                                                        |
| c61093_g1 | up | –                                                        |
| c20021_g1 | up | NADP-dependent malic enzyme                              |
| c26807_g1 | up | –                                                        |
| c40307_g1 | up | Hypothetical protein L484_004609                         |
| c44852_g2 | up | Pleiotropic drug resistance protein 2                    |
| c44085_g2 | up | Type I inositol-1,4,5-trisphosphate 5-phosphatase 11     |
| c44761_g1 | up | Hypothetical protein L484_004241                         |
| c27363_g1 | up | 1-Aminocyclopropane-1-carboxylate oxidase-3-like protein |
| c40734_g1 | up | –                                                        |
| c32167_g1 | up | Purple acid phosphatase 22                               |
| c42882_g1 | up | Hypothetical protein L484_022099                         |
| c94_g1    | up | –                                                        |
| c27378_g1 | up | Hypothetical protein L484_010895                         |
| c36930_g1 | up | Hypothetical protein L484_020944                         |
| c40227_g1 | up | Reticulon-like protein                                   |
| c43124_g2 | up | Kunitz-type elastase inhibitor BrEI-like                 |
| c44823_g3 | up | Wall-associated receptor kinase-like 9                   |
| c46559_g4 | up | Hypothetical protein L484_016736                         |
| c66025_g1 | up | UPF0496 protein [Theobroma UPF0496 protein]              |
| c45810_g2 | up | –                                                        |
| c61930_g1 | up | NADP-dependent malic enzyme                              |
| c27130_g1 | up | Sulfate transporter 3.1                                  |
| c43421_g1 | up | Hypothetical protein L484_017807                         |

|           |    |                                                       |
|-----------|----|-------------------------------------------------------|
| c37504_g1 | up | Hypothetical protein L484_009496                      |
| c47362_g1 | up | Hypothetical protein L484_014177                      |
| c38897_g1 | up | –                                                     |
| c36558_g1 | up | Hypothetical protein POPTR_0006s26730g                |
| c37676_g1 | up | Hypothetical protein L484_017858                      |
| c48021_g1 | up | Hypothetical protein L484_018092                      |
| c66407_g1 | up | Pyrophosphate-energized vacuolar membrane proton pump |
| c39536_g1 | up | Hypothetical protein POPTR_0003s08530g                |
| c33118_g1 | up | –                                                     |
| c72459_g1 | up | Tabersonine 16-O-methyltransferase                    |
| c59693_g1 | up | Hypothetical protein L484_022042                      |
| c44617_g2 | up | Probable receptor-like protein kinase At1g67000       |
| c46901_g1 | up | Ankyrin repeat-containing protein                     |
| c37460_g2 | up | Phytosulfokines 2                                     |
| c6715_g1  | up | –                                                     |
| c36224_g1 | up | Putative F-box/LRR-repeat protein                     |
| c46326_g2 | up | Putative transporter MCH1                             |
| c44641_g1 | up | Hypothetical protein L484_010028                      |
| c39639_g2 | up | Hypothetical protein L484_012729                      |
| c45256_g4 | up | Hypothetical protein AMTR_s00044p00088410             |
| c60098_g1 | up | Root phototropism protein 3                           |
| c22717_g1 | up | Hypothetical protein L484_015854                      |
| c61608_g1 | up | –                                                     |
| c30478_g1 | up | –                                                     |
| c66049_g1 | up | Hypothetical protein EUGRSUZ_J03081                   |
| c49238_g1 | up | –                                                     |
| c30139_g1 | up | –                                                     |
| c32395_g1 | up | Hypothetical protein L484_019794                      |
| c42607_g2 | up | Putative phospholipid-transporting ATPase 9           |
| c24802_g1 | up | Hypothetical protein PRUPE_ppa000723mg                |
| c31425_g1 | up | Hypothetical protein PRUPE_ppa009089mg                |
| c41935_g1 | up | Hypothetical protein L484_026458                      |
| c45256_g5 | up | Actin                                                 |

|           |    |                                                                              |
|-----------|----|------------------------------------------------------------------------------|
| c54067_g1 | up | Hypothetical protein CICLE_v10014579mg                                       |
| c14492_g1 | up | –                                                                            |
| c53951_g1 | up | Putative inorganic phosphate transporter 1-7                                 |
| c33329_g1 | up | Lysine histidine transporter 1                                               |
| c34955_g3 | up | Hypothetical protein L484_026266                                             |
| c32935_g1 | up | Hypothetical protein L484_008838                                             |
| c42983_g2 | up | Nitrate transporter 1.5                                                      |
| c34203_g2 | up | –                                                                            |
| c36701_g2 | up | Hypothetical protein L484_026861                                             |
| c45256_g2 | up | Actin                                                                        |
| c47117_g3 | up | Oxidoreductase family protein                                                |
| c27000_g1 | up | –                                                                            |
| c28074_g1 | up | Hypothetical protein L484_013975                                             |
| c9590_g1  | up | –                                                                            |
| c29896_g1 | up | –                                                                            |
| c17135_g1 | up | Glutamate-gated kainate-type ion channel receptor subunit<br>GluR5, putative |
| c26634_g1 | up | DNA polymerase III subunit                                                   |
| c32908_g1 | up | Uncharacterized protein TCM_006175                                           |
| c72279_g1 | up | Ribonuclease 3-like protein 3                                                |
| c32488_g1 | up | Hypothetical protein L484_024550                                             |
| c33943_g1 | up | Uncharacterized protein LOC103440565                                         |
| c22654_g2 | up | –                                                                            |
| c44341_g2 | up | Pectinesterase 2                                                             |
| c48138_g1 | up | Hypothetical protein L484_005735                                             |
| c44012_g1 | up | Hypothetical protein L484_010090                                             |
| c37653_g1 | up | Glutamate dehydrogenase 2                                                    |
| c32060_g1 | up | Hypothetical protein L484_023636                                             |
| c795_g1   | up | –                                                                            |
| c3341_g1  | up | –                                                                            |
| c39525_g1 | up | Hypothetical protein CICLE_v10023471mg, partial                              |
| c44788_g1 | up | –                                                                            |
| c42278_g1 | up | Hypothetical protein PRUPE_ppa002180mg                                       |

|           |    |                                                               |
|-----------|----|---------------------------------------------------------------|
| c41373_g1 | up | Probable receptor-like protein kinase At1g67000               |
| c42179_g1 | up | Uncharacterized protein LOC103450445                          |
| c43207_g1 | up | Hypothetical protein L484_000923                              |
| c37454_g1 | up | Putative carboxylesterase 2                                   |
| c45272_g1 | up | Hypothetical protein PRUPE_ppa015445mg                        |
| c36690_g1 | up | Extracellular ribonuclease LE                                 |
| c44187_g3 | up | AarF domain-containing kinase isoform 2                       |
| c45836_g5 | up | Hypothetical protein L484_022857                              |
| c48689_g1 | up | Hypothetical protein PRUPE_ppa026773mg, partial               |
| c15824_g1 | up | Hypothetical protein L484_027304                              |
| c20244_g1 | up | —                                                             |
| c34593_g1 | up | —                                                             |
| c38936_g1 | up | Hypothetical protein L484_004108                              |
| c4595_g1  | up | Uncharacterized protein LOC100255813                          |
| c59695_g1 | up | Hypothetical protein L484_013434                              |
| c42344_g1 | up | Glycerol-3-phosphate acyltransferase 1                        |
| c46089_g1 | up | Tabersonine 16-O-methyltransferase                            |
| c42448_g1 | up | Transmembrane protein 87A                                     |
| c76115_g1 | up | Hypothetical protein VITISV_002159                            |
| c16772_g1 | up | Hypothetical protein L484_005955                              |
| c47290_g2 | up | Disease resistance protein RPM1                               |
| c32629_g1 | up | Hypothetical protein L484_022781                              |
| c42536_g1 | up | Hypothetical protein L484_013950                              |
| c45017_g2 | up | Hypothetical protein L484_001595                              |
| c37951_g2 | up | Receptor-like protein kinase HERK 1                           |
| c33015_g1 | up | E3 ubiquitin-protein ligase                                   |
| c34420_g1 | up | Tetratricopeptide repeat-like superfamily protein             |
| c35087_g1 | up | Hypothetical protein L484_011284                              |
| c46923_g1 | up | Hypothetical protein PRUPE_ppa018374mg, partial               |
| c45901_g1 | up | Phytosulfokine receptor 1                                     |
| c40772_g1 | up | Light-inducible protein CPRF-2, putative                      |
| c41268_g2 | up | OSBP (oxysterol binding protein)-related protein 2A isoform 4 |
| c43020_g3 | up | F-box/kelch-repeat protein                                    |

|           |      |                                                    |
|-----------|------|----------------------------------------------------|
| c39264_g1 | up   | Putative peptide/nitrate transporter               |
| c15912_g1 | up   | Triacylglycerol lipase SDP1                        |
| c22092_g1 | up   | Hypothetical protein L484_006800                   |
| c31212_g1 | up   | Hypothetical protein L484_005835                   |
| c47087_g1 | up   | TMV resistance protein N                           |
| c38432_g2 | up   | MATE efflux family protein LAL5                    |
| c27964_g1 | up   | Hypothetical protein L484_025877                   |
| c37931_g1 | up   | Hypothetical protein PRUPE_ppa003644mg             |
| c40517_g1 | up   | Putative inactive receptor kinase                  |
| c43464_g3 | up   | Putative receptor protein kinase ZmPK1             |
| c46089_g2 | up   | Tabersonine 16-O-methyltransferase                 |
| c46765_g1 | up   | Hypothetical protein PRUPE_ppa000824mg             |
| c59705_g1 | up   | Blue copper protein                                |
| c25411_g1 | up   | Putative phosphatidylinositol 4-kinase type 2-beta |
| c44291_g1 | up   | Hypothetical protein L484_019537                   |
| c12696_g1 | up   | Formin-like protein 5                              |
| c45951_g1 | up   | Hypothetical protein PRUPE_ppa002729mg             |
| c22373_g1 | down | Hypothetical protein POPTR_0002s09970g             |
| c22520_g1 | down | Hypothetical protein L484_018717                   |
| c30528_g1 | down | Hypothetical protein CICLE_v10009512mg             |
| c45911_g1 | down | –                                                  |
| c33938_g1 | down | –                                                  |
| c44779_g3 | down | –                                                  |
| c53863_g1 | down | Hypothetical protein L484_010421                   |
| c15623_g2 | down | –                                                  |
| c60212_g1 | down | –                                                  |
| c12141_g2 | down | Hypothetical protein AMTR_s00001p00156400          |
| c38531_g1 | down | Uncharacterized protein LOC100778672               |
| c34672_g1 | down | Ubiquitin-conjugating enzyme E2 28-like            |
| c29445_g2 | down | –                                                  |
| c44947_g2 | down | Hypothetical protein L484_008155                   |
| c45314_g2 | down | Ubiquitin extension protein                        |
| c23095_g1 | down | Hypothetical protein L484_018408                   |

|            |      |                                                          |
|------------|------|----------------------------------------------------------|
| c41524_g1  | down | –                                                        |
| c17983_g1  | down | –                                                        |
| c45028_g2  | down | Hypothetical protein L484_002870                         |
| c23289_g1  | down | 40S ribosomal protein S6 isoform 1                       |
| c32818_g1  | down | –                                                        |
| c31770_g1  | down | Hypothetical protein L484_012921                         |
| c81973_g1  | down | 40S ribosomal protein S2-4-like                          |
| c40782_g1  | down | Ras-related small GTP-binding family protein             |
| c37067_g2  | down | Hypothetical protein PHAVU_011G209600g                   |
| c72407_g1  | down | Uncharacterized protein LOC103331200                     |
| c26507_g1  | down | –                                                        |
| c43836_g10 | down | Hypothetical protein L484_025703                         |
| c40758_g1  | down | Hypothetical protein EUGRSUZ_C01180                      |
| c45532_g1  | down | Uncharacterized G-patch domain protein DDB_G0278987-like |
| c79481_g1  | down | –                                                        |
| c67147_g1  | down | Hypothetical protein L484_013349                         |
| c16333_g2  | down | GTPase obg                                               |
| c42285_g2  | down | Unnamed protein product                                  |
| c43065_g1  | down | Uncharacterized protein LOC103328581                     |
| c46999_g2  | down | –                                                        |
| c32507_g1  | down | –                                                        |
| c79119_g1  | down | –                                                        |
| c46859_g2  | down | Hypothetical protein PRUPE_ppa001084mg                   |
| c59603_g1  | down | Splicing factor U2af small subunit A                     |
| c53817_g1  | down | Rae1-like protein At1g80670                              |
| c46798_g5  | down | Hypothetical protein L484_024429                         |
| c54229_g1  | down | –                                                        |
| c41554_g3  | down | Squalene monooxygenase                                   |
| c78220_g1  | down | –                                                        |
| c38763_g1  | down | Chaperone protein                                        |
| c36857_g4  | down | Pyruvate kinase, cytosolic isozyme                       |
| c66450_g1  | down | –                                                        |
| c40733_g1  | down | 20 kDa Chaperonin                                        |

|           |      |                                                      |
|-----------|------|------------------------------------------------------|
| c53572_g1 | down | Hypothetical protein L484_006058                     |
| c29518_g1 | down | Oxygen-evolving enhancer protein 2                   |
| c45260_g1 | down | –                                                    |
| c43665_g1 | down | Hypothetical protein L484_016056                     |
| c46346_g1 | down | Putative cysteine desulfurase                        |
| c516_g1   | down | –                                                    |
| c49063_g1 | down | Hypothetical protein L484_014979                     |
| c45305_g1 | down | Putative wound-induced protein                       |
| c45329_g1 | down | Hypothetical protein (mitochondrion)                 |
| c78255_g1 | down | F-box/kelch-repeat protein At2g44130-like isoform X1 |
| c65852_g1 | down | MutS2 protein                                        |
| c45955_g8 | down | Conserved hypothetical protein                       |
| c43796_g2 | down | –                                                    |
| c5135_g1  | down | Hypothetical protein L484_016856                     |
| c40137_g1 | down | Hypothetical protein L484_009017                     |
| c31345_g2 | down | –                                                    |
| c41848_g1 | down | Hypothetical protein L484_023631                     |
| c30479_g1 | down | –                                                    |
| c11941_g1 | down | Hsp70-binding protein 1                              |
| c36940_g1 | down | Conserved hypothetical protein                       |
| c5578_g1  | down | Hypothetical protein L484_003254                     |
| c31370_g1 | down | 3-Ketoacyl-CoA synthase 21                           |
| c44654_g1 | down | Hypothetical protein L484_004530                     |
| c66547_g1 | down | –                                                    |
| c45436_g1 | down | DNA nucleotidylexotransferase                        |
| c24707_g1 | down | –                                                    |
| c42423_g1 | down | Prolyl 4-hydroxylase subunit alpha-2                 |
| c19700_g1 | down | Probable 2-aminoethanethiol dioxygenase-like         |
| c49027_g1 | down | 33 kDa Ribonucleoprotein                             |
| c635_g1   | down | –                                                    |
| c41587_g1 | down | –                                                    |
| c39705_g1 | down | –                                                    |
| c41386_g1 | down | Ubiquitin-activating enzyme E1 1                     |

|           |      |                                                             |
|-----------|------|-------------------------------------------------------------|
| c47334_g1 | down | Uncharacterized protein LOC103319422                        |
| c32820_g1 | down | Hypothetical protein PRUPE_ppa006638mg                      |
| c59768_g1 | down | Mitogen-activated protein kinase kinase kinase 2            |
| c43296_g6 | down | Histone H2B [ <i>Nicotiana tabacum</i> ]                    |
| c60077_g1 | down | _                                                           |
| c66702_g1 | down | RING-H2 finger protein ATL3                                 |
| c44090_g1 | down | Hypothetical protein L484_004039                            |
| c34964_g1 | down | Two-component response regulator                            |
| c53451_g1 | down | Cyclin-dependent kinase inhibitor 7                         |
| c44815_g1 | down | Putative methyltransferase NSUN5-like isoform X1            |
| c67083_g1 | down | _                                                           |
| c34253_g1 | down | PHD finger protein ALFIN-LIKE 5                             |
| c41614_g1 | down | Hypothetical protein JCGZ_25539                             |
| c37107_g1 | down | Hypothetical protein L484_021058                            |
| c44321_g1 | down | Hypothetical protein JCGZ_24457                             |
| c53641_g1 | down | Hypothetical protein L484_024446                            |
| c9320_g1  | down | Hypothetical protein L484_021185                            |
| c44555_g1 | down | 50S ribosomal protein L29                                   |
| c45642_g1 | down | Hypothetical protein L484_004416                            |
| c56769_g1 | down | _                                                           |
| c11381_g1 | down | J1P                                                         |
| c15791_g1 | down | Hypothetical protein L484_009906                            |
| c81297_g1 | down | _                                                           |
| c11381_g2 | down | DnaJ-like protein                                           |
| c33137_g1 | down | Metal tolerance protein 4                                   |
| c39962_g1 | down | Hypothetical protein L484_002382                            |
| c13584_g1 | down | DNA-directed RNA polymerase II subunit                      |
| c38023_g2 | down | Ubiquitin-conjugating enzyme E2-17 kDa 10/12 family protein |
| c18787_g1 | down | Hypothetical protein L484_020113                            |
| c29665_g1 | down | Hypothetical protein L484_013163                            |
| c40571_g2 | down | Hypothetical protein PRUPE_ppa000855mg                      |
| c34095_g1 | down | Hypothetical protein CICLE_v10002169mg                      |
| c59680_g1 | down | SODA protein                                                |



|           |      |                                                                  |
|-----------|------|------------------------------------------------------------------|
| c45554_g1 | down | Upstream activation factor subunit spp27-like                    |
| c37015_g6 | down | –                                                                |
| c46767_g3 | down | Peptidyl-prolyl cis-trans isomerase FKBP65                       |
| c26056_g1 | down | –                                                                |
| c34449_g2 | down | Uncharacterized protein LOC103337247                             |
| c36979_g1 | down | Proliferating cell nuclear antigen large form                    |
| c22756_g1 | down | Aspartokinase 2, chloroplastic isoform X2                        |
| c47131_g1 | down | Germination-specific cysteine protease 1                         |
| c44648_g1 | down | Protein FLUORESCENT IN BLUE LIGHT                                |
| c72587_g1 | down | ATP synthase subunit alpha                                       |
| c24496_g1 | down | Hypothetical protein PRUPE_ppa003710mg                           |
| c66480_g1 | down | Oleosin H-isoform [ <i>Ficus pumila</i> var. <i>awkeotsang</i> ] |
| c41032_g2 | down | –                                                                |
| c40709_g1 | down | –                                                                |
| c44815_g2 | down | Hypothetical protein L484_003775                                 |
| c47624_g2 | down | RING-H2 finger protein ATL5                                      |
| c1562_g2  | down | –                                                                |
| c40332_g2 | down | –                                                                |
| c40459_g3 | down | –                                                                |
| c40269_g2 | down | RNA-binding family protein, putative isoform 1                   |
| c20122_g1 | down | –                                                                |
| c39101_g1 | down | Uncharacterized protein isoform 1                                |
| c47776_g1 | down | Pollen-specific leucine-rich repeat extensin-like protein 3      |
| c78629_g1 | down | Hypothetical protein L484_023221                                 |
| c19212_g1 | down | –                                                                |
| c27944_g1 | down | Hypothetical protein POPTR_0007s06150g                           |
| c45642_g3 | down | Putative plastid-lipid-associated protein 8                      |
| c46053_g4 | down | Histone-lysine N-methyltransferase CLF                           |
| c45486_g6 | down | –                                                                |
| c43728_g1 | down | Pyrophosphate-energized vacuolar membrane proton pump 1-like     |
| c40098_g1 | down | Hypothetical protein L484_022156                                 |
| c31345_g1 | down | Uncharacterized protein LOC102626192                             |

|           |      |                                                                  |
|-----------|------|------------------------------------------------------------------|
| c42014_g1 | down | Putative xyloglucan                                              |
| c41409_g1 | down | F-box/kelch-repeat protein                                       |
| c43482_g2 | down | Hypothetical protein L484_021141                                 |
| c42848_g2 | down | Hypothetical protein L484_003351                                 |
| c72159_g2 | down | Hypothetical protein L484_010769                                 |
| c14380_g1 | down | Hypothetical protein L484_020297                                 |
| c53453_g1 | down | Hypothetical protein L484_014149                                 |
| c80552_g1 | down | –                                                                |
| c60552_g1 | down | –                                                                |
| c53495_g1 | down | Hypothetical protein L484_012395                                 |
| c42539_g3 | down | Hypothetical protein L484_019883                                 |
| c44390_g3 | down | Uncharacterized protein LOC102631241                             |
| c47340_g1 | down | GTP-binding nuclear protein Ran1-like                            |
| c44000_g2 | down | Endoplasmic reticulum oxidoreductin-1-like                       |
| c37354_g1 | down | Ubiquitin-activating enzyme E1 2                                 |
| c40539_g1 | down | –                                                                |
| c25334_g1 | down | –                                                                |
| c27048_g1 | down | –                                                                |
| c43017_g1 | down | Vesicle-associated protein 4-1                                   |
| c53806_g1 | down | –                                                                |
| c26436_g1 | down | Hypothetical protein L484_005181                                 |
| c40427_g2 | down | –                                                                |
| c36979_g2 | down | Proliferating cell nuclear antigen large form                    |
| c37412_g1 | down | –                                                                |
| c42386_g1 | down | –                                                                |
| c37896_g2 | down | Influenza virus NS1A-binding protein-A-like protein              |
| c217_g1   | down | Haloacid dehalogenase-like hydrolase domain-containing protein 3 |
| c72145_g1 | down | Phospholipase C 3                                                |
| c35763_g1 | down | Photosystem I reaction center subunit III                        |
| c38937_g1 | down | Hypothetical protein PRUPE_ppa012501mg                           |
| c31216_g1 | down | Uncharacterized protein LOC102628268                             |
| c41672_g2 | down | Hypothetical protein L484_013065                                 |

|           |      |                                            |
|-----------|------|--------------------------------------------|
| c34195_g1 | down | –                                          |
| c46310_g2 | down | Hypothetical protein, partial              |
| c73293_g1 | down | Uncharacterized protein TCM_029816         |
| c11401_g1 | down | Ubiquitin-activating enzyme E1 2-like      |
| c59593_g1 | down | Pyruvate decarboxylase isozyme 1           |
| c74957_g1 | down | –                                          |
| c37557_g1 | down | Hypothetical protein L484_003773           |
| c36842_g1 | down | –                                          |
| c45702_g1 | down | Hypothetical protein L484_025669           |
| c31893_g1 | down | Uncharacterized protein LOC103336598       |
| c54501_g1 | down | Hypothetical protein L484_012802           |
| c30450_g1 | down | BTB/POZ domain-containing protein          |
| c43244_g2 | down | Hypothetical protein L484_011333           |
| c66352_g1 | down | Uncharacterized protein TCM_021870         |
| c40875_g1 | down | Hypothetical protein L484_001846           |
| c36842_g2 | down | –                                          |
| c45694_g9 | down | Hypothetical protein L484_004489           |
| c38692_g1 | down | –                                          |
| c23527_g1 | down | –                                          |
| c31666_g1 | down | Hypothetical protein L484_013693           |
| c61025_g1 | down | Multiprotein-bridging factor 1c            |
| c64593_g1 | down | –                                          |
| c37311_g1 | down | Lon protease 2                             |
| c44457_g1 | down | Aspartate aminotransferase, putative       |
| c39040_g1 | down | –                                          |
| c43910_g1 | down | BAG family molecular chaperone regulator 5 |
| c42533_g2 | down | Hypothetical protein L484_023363           |
| c37210_g1 | down | Hypothetical protein PRUPE_ppa024646mg     |
| c46891_g3 | down | Zinc finger family protein                 |
| c36467_g1 | down | Chaperone protein dnaJ 6-like              |
| c23298_g1 | down | Hypothetical protein L484_017604           |
| c47242_g1 | down | Hypothetical protein                       |
| c47148_g3 | down | –                                          |

|            |      |                                               |
|------------|------|-----------------------------------------------|
| c45486_g1  | down | –                                             |
| c12060_g1  | down | Eukaryotic translation initiation factor 5A-4 |
| c23424_g1  | down | Hypothetical protein MIMGU_mgv1a011980mg      |
| c5724_g1   | down | Pleiotropic drug resistance protein 1         |
| c78541_g1  | down | Hypothetical protein L484_011513              |
| c46227_g1  | down | –                                             |
| c27279_g1  | down | Hypothetical protein L484_000015              |
| c47172_g3  | down | Hypothetical protein VITISV_024648            |
| c47349_g1  | down | Hypothetical protein L484_014397              |
| c74036_g1  | down | –                                             |
| c47023_g1  | down | tRNA (guanosine(18)-2'-O)-methyltransferase   |
| c46209_g10 | down | –                                             |
| c37406_g5  | down | Transcription factor                          |
| c40975_g1  | down | Hypothetical protein L484_026249              |
| c25154_g1  | down | Hypothetical protein L484_004039              |
| c38692_g2  | down | –                                             |
| c29538_g2  | down | –                                             |
| c27562_g1  | down | GATA zinc finger domain-containing protein 10 |
| c30024_g1  | down | Hypothetical protein L484_003873              |
| c27062_g1  | down | –                                             |
| c19765_g1  | down | –                                             |
| c39999_g2  | down | –                                             |
| c29542_g1  | down | –                                             |
| c25986_g2  | down | 14 kDa Proline-rich protein DC2.15-like       |
| c43738_g1  | down | Hypothetical protein L484_007912              |
| c47169_g1  | down | –                                             |
| c45741_g2  | down | Hypothetical protein L484_013397              |
| c29873_g1  | down | Hypothetical protein L484_013585              |
| c74405_g1  | down | –                                             |
| c44553_g4  | down | –                                             |
| c53468_g3  | down | Putative methyltransferase PMT21              |
| c46749_g1  | down | Uncharacterized protein LOC103323512          |
| c30334_g1  | down | Purple acid phosphatase 15                    |

|           |      |                                         |
|-----------|------|-----------------------------------------|
| c36345_g1 | down | Conserved hypothetical protein          |
| c9875_g1  | down | Hypothetical protein L484_005314        |
| c69858_g1 | down | –                                       |
| c42507_g1 | down | Hypothetical protein L484_026632        |
| c47280_g1 | down | Putative membrane protein               |
| c36512_g1 | down | –                                       |
| c41482_g1 | down | Putative peptide/nitrate transporter    |
| c45435_g1 | down | Putative uncharacterized protein        |
| c35641_g2 | down | Fibronectin-binding protein             |
| c45943_g3 | down | Alcohol dehydrogenase                   |
| c39174_g2 | down | –                                       |
| c43425_g2 | down | Hypothetical protein Csp_D29560         |
| c45793_g3 | down | Molybdopterin biosynthesis protein CNX3 |
| c29573_g1 | down | –                                       |
| c44457_g2 | down | Hypothetical protein L484_016377        |
| c45999_g2 | down | Hypothetical protein PHAVU_003G241600g  |

---

FDR  $\leq$  0.001 and absolute value of log<sub>2</sub> ratio  $\geq$  2 (2-fold) as the threshold.

\*GY, young 'Green Peel' fruit; PY, young 'Purple Peel' fruit; GM, mature 'Green Peel' fruit; PM, mature

'Purple Peel' fruit.

## Supplementary Figure legends

**Figure S1.** GO classification of unigenes of *Ficus carica* L. syconia. The results are summarized in (a) T4-P vs. T4-F; (b) T4-F vs. LD-F; (c) T4-P vs. LD-P. GO categories: Biological Process, Cellular Component and Molecular Function. T4-P, peel at stage T4; T4-F, female flower tissue at stage T4; LD-P, stage 4 peel following light-deprivation treatment; LD-F, stage 4 female flower tissue following light-deprivation treatment

Figure S1

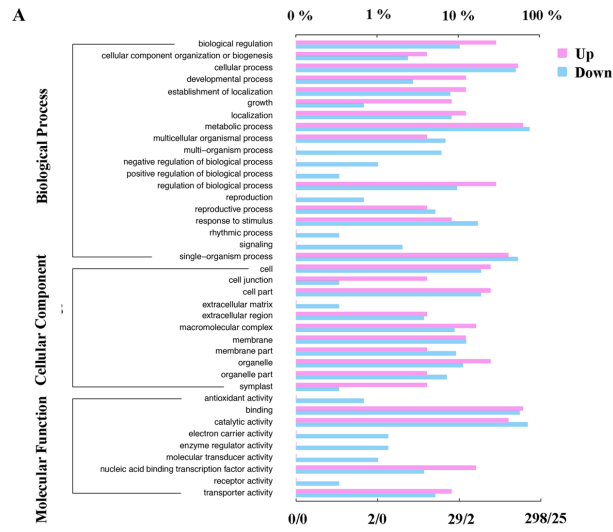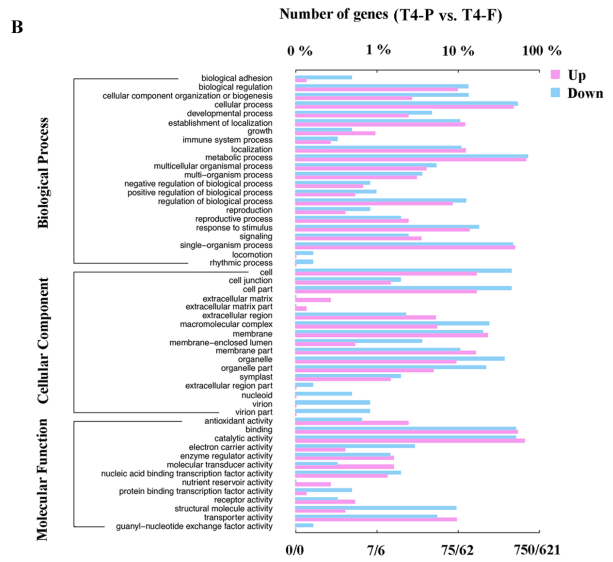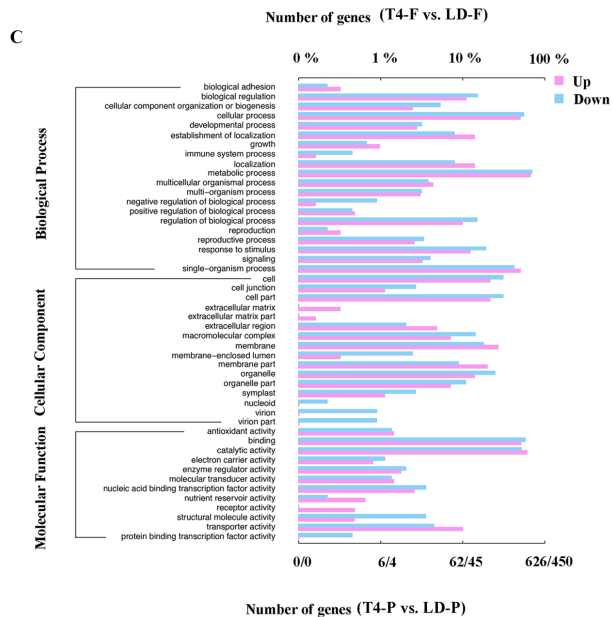

Supplement: 12870_2019_1816_MOESM1_ESM.pdf [file 12870_2019_1816_MOESM1_ESM.pdf]
